# Supplementary material
Source: PubMed Central journal article supplement (PMC4303543)
Supplement: NIHMS645083-supplement-Supplement.pdf [file NIHMS645083-supplement-Supplement.pdf]

## Supplementary Figure 1

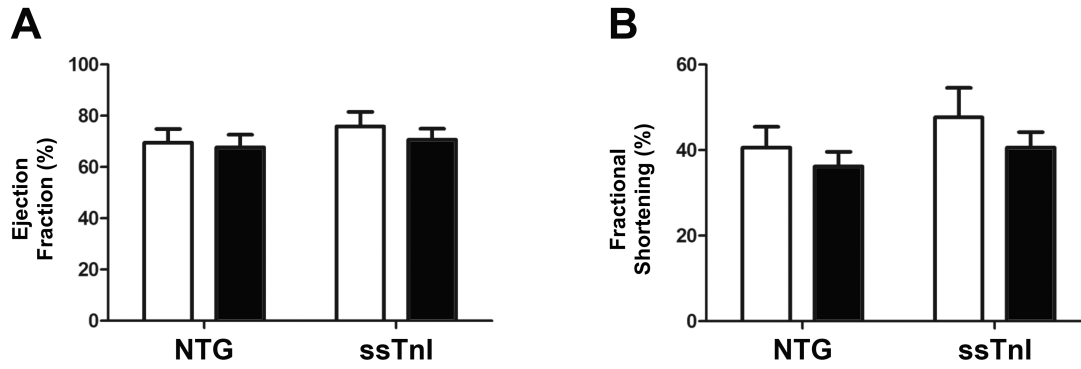

### Supplementary Figure 1 – Ejection fraction (A) and fractional shortening (B)

measured via echocardiography in mice 10 weeks after TAC. Data is mean $\pm$ SE, n=8-10.
